# Supplementary material for: Association between affective temperaments and psychosomatic symptoms in women with Hashimoto’s thyroiditis
Source: PLoS One. 2023 Aug 15;18(8):e0290066. doi: 10.1371/journal.pone.0290066 (PMC10427010; doi:10.1371/journal.pone.0290066)
Supplement: S1 Table — (XLSX) [file pone.0290066.s002.xlsx]

## Sheet: Sheet1
Variable	Hypothiroid HT*	Euthyroid HT	Control (healthy) group n=73	Statistical significance p*
	n=49	n=24
Age, mean±sd	43.8±11.1	38.7±7.1	42.1±10.2	0.125
Education level, Primary/Secondary	31 (63.3)	12 (50)	40 (54.8)	0.495
Education level, High/ Master	18 (36.7)	12 (50)	33 (45.2)
Marital status, maried, living with partner, n (%)	17 (34.7)	6 (25)	20 (27.4)	0.338
Marital status, single, devorced, widow, n (%)	32 (65.3)	18 (75)	53 (72.6)
Work status, employed, n (%)	37 (75.5)	18 (75)	59 (80.8)	0.76
Work status, not epmployed, n (%)	10 (20.4)	6 (25)	12 (16.4)
Work status, retired, n (%)	2 (4.1)	0 (0)	2 (2.7)
TSH, Med (25th-75th)	11.8 ± 3	3.2 (1.89-3.95)	2.27 (1.83-3)	<0.001
FT4, mean±sd	6.45 (5.25-10.6)	14.4 ± 2.3	12.6±3.0	<0.001
Anti TPO, Med (25th-75th)	358 (138.6-795)	194.5 (100.6-276)	17 (10-27)	<0.001
BMI (kg/m2)*, mean±sd	26 ± 4.2	25.1 ± 4.8	25.2±4.7	0.601
Waist size (cm), mean±sd	80.1 ± 12.5	78.6 ± 12.2	79.5±12.7	0.892
